# Supplementary material for: Preoperative hemoglobin-platelet ratio can significantly predict progression and mortality outcomes in patients with T1G3 bladder cancer undergoing transurethral resection of bladder tumor
Source: PubMed Central journal article supplement (PMC5915098; doi:10.18632/oncotarget.23896), 2018-01-03
Supplement: oncotarget-09-18627-s001.pdf [file oncotarget-09-18627-s001.pdf]

# Preoperative hemoglobin-platelet ratio can significantly predict progression and mortality outcomes in patients with T1G3 bladder cancer undergoing transurethral resection of bladder tumor

## SUPPLEMENTARY MATERIALS

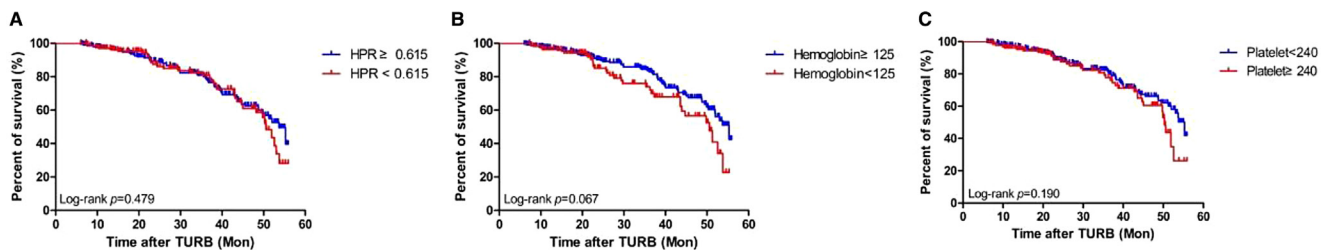

**Supplementary Figure 1:** Kaplan-Meier survival curves for comparing recurrence-free according to the preoperative status of (A) hemoglobin-platelet ratio (HPR), (B) Hemoglobin, (C) Platelet counts, respectively in the T1G3 bladder cancer patients who underwent transurethral resection of the bladder (TURB). Statistical differences were compared between the two groups by using the log-rank test
